# Supplementary material for: Potential COVID-19 Therapies from Computational Repurposing of Drugs and Natural Products against the SARS-CoV-2 Helicase
Source: MDPI journal article supplement (doi:10.3390/ijms23147704), 2022-07-12
Supplement: s1 [file s1]

# **Putative COVID-19 therapies from computational repurposing of drugs and natural products against the SARS-CoV-2 helicase**

**Sakshi Piplani <sup>1</sup>, Puneet Singh <sup>1</sup>, David A. Winkler <sup>2,3,4</sup> and Nikolai Petrovsky <sup>1,5,\*</sup>**

<sup>1</sup> Vaxine Pty Ltd., 11 Walkley Avenue, Adelaide 5046, Australia;  
sakshi.piplani@flinders.edu.au (S.P.); puneet.singh@flinders.edu.au (P.S.)

<sup>2</sup> Biochemistry and Chemistry Department, La Trobe University, Kingsbury Drive,  
Bundoora 3042, Australia; d.winkler@latrobe.edu.au

<sup>3</sup> Monash Institute of Pharmaceutical Sciences, Monash University, Parkville 3052, Australia

<sup>4</sup> School of Pharmacy, University of Nottingham, Nottingham NG7 2RD, UK

<sup>5</sup> Department of Diabetes and Endocrinology, Flinders Medical Centre, Flinders University, 1  
Flinders Drive, Bedford Park 5042, Australia

\* Correspondence: nikolai.petrovsky@flinders.edu.au

## **Supplementary information**

**Table S1.** Binding scores and previously published SARS-Cov-2 data for 88 top ranked SARS-CoV-2 helicase hits.

| No. | Drugbank ID | Name           | $\Delta G_{\text{MMPBSA}}$<br>kcal/mol | $\Delta G_{\text{thermo}}$<br>kcal/mol | Experimental SARS-CoV-2 data                                                                                                                                                                                                                                                                                                                                                                           |
|-----|-------------|----------------|----------------------------------------|----------------------------------------|--------------------------------------------------------------------------------------------------------------------------------------------------------------------------------------------------------------------------------------------------------------------------------------------------------------------------------------------------------------------------------------------------------|
| 1   | DB08930     | Dolutegravir   | -42.15                                 | -45.87                                 | SARS-CoV-2 activity in Vero cells $EC_{50} = 22\mu\text{M}$ , $CC_{50} > 40\mu\text{M}$ . <sup>1</sup>                                                                                                                                                                                                                                                                                                 |
| 2   | DB04703     | Hesperidin     | -41.23                                 | -39.58                                 | SARS-Cov-2 Mpro inhibition $IC_{50} = 8.3\mu\text{M}$ . <sup>2</sup>                                                                                                                                                                                                                                                                                                                                   |
| 3   | DB11751     | Cabotegravir   | -40.77                                 | -42.31                                 | ...                                                                                                                                                                                                                                                                                                                                                                                                    |
| 4   | DB00872     | Conivaptan     | -40.20                                 | -39.65                                 | SARS-CoV-2 $EC_{50}$ $10\mu\text{M}$ $CC_{50}$ $13\mu\text{M}$ in HEK-293T cells. <sup>3</sup> $EC_{50} = 12.2\mu\text{M}$ against HCoV-OC43.                                                                                                                                                                                                                                                          |
| 5   | DB00673     | Aprepitant     | -40.12                                 | -45.58                                 | ...                                                                                                                                                                                                                                                                                                                                                                                                    |
| 6   | DB11799     | Bictegravir    | -39.78                                 | -41.22                                 | Vero E6 cells for SARS-CoV-2 that returned an $EC_{50} > 10\mu\text{M}$ and $CC_{50} > 50\mu\text{M}$ for bictegravir. <sup>4</sup>                                                                                                                                                                                                                                                                    |
| 7   | DB09238     | Manidipine     | -39.77                                 | -41.25                                 | $IC_{50}$ $10\mu\text{M}$ against SARS-CoV-2 M <sup>pro</sup> ; $14\mu\text{M}$ against PL <sup>pro</sup> .<br>Apparent SARS-CoV-2 $EC_{50} = 15 \pm 1\mu\text{M}$ in a plaque reduction assay. <sup>5</sup> et al. Kinetic M <sup>pro</sup> $IC_{50} = 4.8\mu\text{M}$ .<br>SARS-CoV-2 activity in in HUH7 cells ( $IC_{50}=2\mu\text{M}$ ) and Vero cells ( $IC_{50}=7.5\mu\text{M}$ ). <sup>6</sup> |
| 8   | DB00932     | Tipranavir     | -39.74                                 | -42.56                                 | Inhibits replication of SARS-CoV-2 in VeroE6 cells, but low SI ( $EC_{50} = 13\mu\text{M}$ , $CC_{50} = 77\mu\text{M}$ , SI = 6). <sup>7</sup>                                                                                                                                                                                                                                                         |
| 9   | DB04452     | Aminoquinuride | -39.58                                 | -41.89                                 | ...                                                                                                                                                                                                                                                                                                                                                                                                    |
| 10  | DB01419     | Antrafenine    | -39.14                                 | -36.47                                 | ...                                                                                                                                                                                                                                                                                                                                                                                                    |
| 11  | DB15197     | RSV-604        | -38.75                                 | -36.21                                 | ...                                                                                                                                                                                                                                                                                                                                                                                                    |
| 12  | DB004445    | Epirubicin     | -38.74                                 | -35.62                                 | ...                                                                                                                                                                                                                                                                                                                                                                                                    |
| 13  | DB01100     | Pimozide       | -38.36                                 | -35.44                                 | $IC_{50}$ for SARS-CoV-2 M <sup>pro</sup> = $42 \pm 2\mu\text{M}$ . <sup>8</sup>                                                                                                                                                                                                                                                                                                                       |
| 14  | DB01698     | Rutin          | -38.32                                 | -40.44                                 | $IC_{50}=32\mu\text{M}$ for SARS-CoV-2 3CL <sup>pro</sup> . <sup>9</sup>                                                                                                                                                                                                                                                                                                                               |

| No<br>. | Drugbank<br>ID | Name          | $\Delta G_{MMPBSA}$<br>kcal/mol | $\Delta G_{thermo}$<br>kcal/mol | Experimental SARS-CoV-2 data                                                                                                                                                                                         |
|---------|----------------|---------------|---------------------------------|---------------------------------|----------------------------------------------------------------------------------------------------------------------------------------------------------------------------------------------------------------------|
| 15      | DB00266        | Dicoumarol    | -37.56                          | -38.39                          | ...                                                                                                                                                                                                                  |
| 16      | DB04842        | Fluspirilene  | -36.77                          | -38.38                          | IC <sub>50</sub> = 3.1μM and CC <sub>50</sub> = 30.3μM with SI=10 in Vero E6 cells. <sup>10</sup> In vitro activity in MERS-CoV and SARS-CoV-1 (SARS) = 7.5μM and 6.0μM respectively in Vero E6 cells. <sup>11</sup> |
| 17      | DB03044        | Doramapimod   | -36.21                          | -39.45                          | IC <sub>50</sub> = 10μM against SARS-CoV-2 in MRC5-ACE2 cells. Useful synergism with remdesivir in killing the virus in vitro. <sup>12</sup>                                                                         |
| 18      | DB00950        | Fexofenadine  | -35.47                          | -37.66                          | ...                                                                                                                                                                                                                  |
| 19      | DB00637        | Astemizole    | -35.35                          | -38.70                          | EC <sub>50</sub> = 1μM in Vero E6 cells infected with SARS-CoV-2. <sup>13</sup> EC <sub>50</sub> values for MERS-CoV and SARS-CoV-1 (SARS) of 4.9μM and 5.5μM respectively. <sup>11</sup>                            |
| 20      | DB01100        | Pimozide      | -34.67                          | -38.21                          | SARS-CoV-2 Mpro IC <sub>50</sub> = 42 μM. <sup>8</sup>                                                                                                                                                               |
| 21      | DB06144        | Sertindole    | -34.56                          | -36.77                          | ...                                                                                                                                                                                                                  |
| 22      | DB12580        | Tradipitant   | -34.21                          | -32.11                          | Phase 3 clinical trial for COVID-19 NCT04326426. <sup>14</sup>                                                                                                                                                       |
| 23      | DB08881        | Vemurafenib   | -33.78                          | -30.25                          | SARS-CoV-2 in vitro inhibition in Vero cells, IC <sub>50</sub> =7.0 μM and CC <sub>50</sub> >50 μM. <sup>15</sup>                                                                                                    |
| 24      | DB09295        | Talniflumate  | -33.22                          | -31.47                          | ...                                                                                                                                                                                                                  |
| 25      | DB09048        | Netupitant    | -32.45                          | -30.74                          | ...                                                                                                                                                                                                                  |
| 26      | DB11759        | Penvonedistat | -32.44                          | -35.41                          | ...                                                                                                                                                                                                                  |
| 27      | DB00966        | Telmisartan   | -32.31                          | -35.08                          | ...                                                                                                                                                                                                                  |
| 28      | DB09298        | Silibinin     | -32.26                          | -30.41                          | ...                                                                                                                                                                                                                  |
| 29      | DB11995        | Avatrombopag  | -31.52                          | -35.47                          | ...                                                                                                                                                                                                                  |
| 30      | DB12877        | Oxatomide     | -31.41                          | -30.47                          | In vitro SARS-CoV-2 inhibition in Vero CCL-81 cells IC <sub>50</sub> 25 μM and CC <sub>50</sub> = 40μM. <sup>16</sup>                                                                                                |
| 31      | DB06555        | Siramesine    | -30.47                          | -31.53                          | ...                                                                                                                                                                                                                  |
| 32      | DB14883        | Lorecivivint  | -30.41                          | -32.96                          | ...                                                                                                                                                                                                                  |
| 33      | DB03966        | Clorobiocin   | -29.60                          | -31.92                          | ...                                                                                                                                                                                                                  |

| No<br>. | Drugbank<br>ID | Name               | $\Delta G_{\text{MMPBSA}}$<br>kcal/mol | $\Delta G_{\text{thermo}}$<br>kcal/mol | Experimental SARS-CoV-2 data                                                                                                                                                                                                                                                |
|---------|----------------|--------------------|----------------------------------------|----------------------------------------|-----------------------------------------------------------------------------------------------------------------------------------------------------------------------------------------------------------------------------------------------------------------------------|
| 34      | DB12306        | Cipargamin         | -29.47                                 | -30.45                                 | ...                                                                                                                                                                                                                                                                         |
| 35      | DB12566        | Decernotinib       | -29.31                                 | -24.74                                 | ...                                                                                                                                                                                                                                                                         |
| 36      | DB01260        | Desonide           | -29.18                                 | -29.15                                 | ...                                                                                                                                                                                                                                                                         |
| 37      | DB11925        | Vistusertib        | -28.97                                 | -25.23                                 | SARS-CoV-2 activity in Vero E6 cells, $IC_{50} < 25$ nM. <sup>17</sup>                                                                                                                                                                                                      |
| 38      | DB13791        | Penfluridol        | -28.75                                 | -30.41                                 | SARS-CoV-2 in vitro activity in Vero CCL-81 cells, $EC_{50}$ 1.9 $\mu$ M and $CC_{50}$ = 3.3 $\mu$ M. <sup>16</sup> In vitro activity in Vero E6 cells with $IC_{50}$ = 2.4 $\mu$ M and $CC_{50}$ = 12.9 $\mu$ M. <sup>18</sup>                                             |
| 39      | DB15583        | Fluazuron          | -28.24                                 | -31.42                                 | ...                                                                                                                                                                                                                                                                         |
| 40      | DB07138        | Neflamapimod       | -28.03                                 | -30.38                                 | ...                                                                                                                                                                                                                                                                         |
| 41      | DB12703        | Omipalisib         | -27.98                                 | -24.36                                 | ...                                                                                                                                                                                                                                                                         |
| 42      | DB12264        | Atevirdine         | -27.89                                 | -29.33                                 | ...                                                                                                                                                                                                                                                                         |
| 43      | DB13434        | Fenticonazole      | -27.87                                 | -23.12                                 | ...                                                                                                                                                                                                                                                                         |
| 44      | DB13074        | Macimorelin        | -27.84                                 | -22.34                                 | ...                                                                                                                                                                                                                                                                         |
| 45      | DB00342        | Terfenadine        | -27.33                                 | -28.88                                 | SARS-CoV-2 $IC_{50}$ = 3.0 $\mu$ M in Vero cells. <sup>19</sup>                                                                                                                                                                                                             |
| 46      | DB11616        | Pirarubicin        | -26.74                                 | -26.33                                 | $IC_{50}$ = 4-7 $\mu$ M in nsp15 FRET assay. <sup>20</sup>                                                                                                                                                                                                                  |
| 47      | DB01349        | Tasosartan         | -26.32                                 | -26.44                                 | ...                                                                                                                                                                                                                                                                         |
| 48      | DB15630        | Glumetinib         | -26.10                                 | -24.85                                 | ...                                                                                                                                                                                                                                                                         |
| 49      | DB00547        | Desoximetason<br>e | -26.09                                 | -25.29                                 | ...                                                                                                                                                                                                                                                                         |
| 50      | DB11977        | Golvatinib         | -25.65                                 | -28.45                                 | ...                                                                                                                                                                                                                                                                         |
| 51      | DB06589        | Pazopanib          | -25.58                                 | -25.14                                 | ...                                                                                                                                                                                                                                                                         |
| 52      | DB00568        | Cinnarizine        | -25.54                                 | -25.10                                 | SARS-CoV-2 activity in Vero CCL-81 cells, $EC_{50}$ =40 $\mu$ M, $CC_{50}$ = 100 $\mu$ M. <sup>16</sup>                                                                                                                                                                     |
| 53      | DB11830        | Mocetinostat       | -25.45                                 | -27.99                                 | ...                                                                                                                                                                                                                                                                         |
| 54      | DB00619        | Imatinib           | -25.36                                 | -27.87                                 | Inhibits SARS-CoV-2 with an $IC_{50}$ = 130 nM in Vero cells. <sup>21</sup> $EC_{50}$ = 2.5 $\mu$ M, $CC_{50}$ > 40 $\mu$ M in Vero E6 cells. <sup>22</sup> SARS-CoV-2 $EC_{50}$ =4.9 $\mu$ M, $IC_{50}$ =37.3 $\mu$ M by luciferase assay in lung organoids. <sup>23</sup> |

| No<br>. | Drugbank<br>ID | Name                  | $\Delta G_{\text{MMPBSA}}$<br>kcal/mol | $\Delta G_{\text{thermo}}$<br>kcal/mol | Experimental SARS-CoV-2 data                                                                                                                                                      |
|---------|----------------|-----------------------|----------------------------------------|----------------------------------------|-----------------------------------------------------------------------------------------------------------------------------------------------------------------------------------|
| 55      | DB12427        | Orvepitant            | -25.36                                 | -22.78                                 | ...                                                                                                                                                                               |
| 56      | DB14895        | Vibegron              | -24.88                                 | -20.32                                 | ...                                                                                                                                                                               |
| 57      | DB13248        | Phthalylsulfathiazole | -24.52                                 | -26.74                                 | ...                                                                                                                                                                               |
| 58      | DB13005        | Rebastinib            | -24.51                                 | -22.52                                 | ...                                                                                                                                                                               |
| 59      | DB06660        | Saredutant            | -24.48                                 | -22.45                                 | ...                                                                                                                                                                               |
| 60      | DB11986        | Entrectinib           | -24.23                                 | -27.12                                 | ...                                                                                                                                                                               |
| 61      | DB09003        | Clocapramine          | -24.22                                 | -20.58                                 | ...                                                                                                                                                                               |
| 62      | DB06446        | Dotarizine            | -24.13                                 | -20.33                                 | ...                                                                                                                                                                               |
| 63      | DB09143        | Sonidegib             | -24.11                                 | -21.20                                 | ...                                                                                                                                                                               |
| 64      | DB06077        | Lumateperone          | -23.87                                 | -20.96                                 | ...                                                                                                                                                                               |
| 65      | DB06638        | Quarfloxin            | -23.56                                 | -27.18                                 | ...                                                                                                                                                                               |
| 66      | DB13919        | Candesartan           | -23.21                                 | -27.33                                 | Inhibits human coronavirus (HCoV) strain OC43 propagated in LLC-MK2 cells, $IC_{50} = 3.6\mu\text{M}$ , $CC_{50} \sim 10\mu\text{M}$ . <sup>3</sup>                               |
| 67      | DB15391        | Elenbecestat          | -23.12                                 | -25.63                                 | ...                                                                                                                                                                               |
| 68      | DB08901        | Ponatinib             | -22.89                                 | -27.03                                 | Inhibition of SARS-CoV-2 in Huh7 cells engineered with the human ACE-2 receptor using immunofluorescence, $EC_{50} = 1.1\mu\text{M}$ , $CC_{50} = 8.7\mu\text{M}$ . <sup>24</sup> |
| 69      | DB12412        | Gemigliptin           | -22.88                                 | -20.79                                 | ...                                                                                                                                                                               |
| 70      | DB12978        | Pexidartinib          | -22.87                                 | -20.23                                 | SARS-CoV-2 inhibition $IC_{50} = 5.4\mu\text{M}$ in Caco-2 cells. <sup>25</sup>                                                                                                   |
| 71      | DB04908        | Flibanserin           | -22.47                                 | -19.25                                 | ...                                                                                                                                                                               |
| 72      | DB12562        | Setipiprant           | -22.32                                 | -25.92                                 | ...                                                                                                                                                                               |
| 73      | DB06212        | Tolvaptan             | -22.29                                 | -25.47                                 | ...                                                                                                                                                                               |
| 74      | DB13042        | Fenoverine            | -22.10                                 | -23.44                                 | ...                                                                                                                                                                               |
| 75      | DB06630        | Anacetrapib           | -21.98                                 | -23.47                                 | ...                                                                                                                                                                               |
| 76      | DB13814        | Talampicillin         | -21.64                                 | -20.10                                 | ...                                                                                                                                                                               |
| 77      | DB11904        | Flumatinitib          | -21.25                                 | -19.23                                 | ...                                                                                                                                                                               |
| 78      | DB12492        | Piritramide           | -21.23                                 | -18.53                                 | ...                                                                                                                                                                               |
| 79      | DB13050        | Tirilazad             | -21.21                                 | -25.31                                 | ...                                                                                                                                                                               |
| 80      | DB11851        | Bafetinib             | -20.78                                 | -22.35                                 | SARS-CoV-2 inhibition in A549 cells over-expressing ACE2, $EC_{50}$                                                                                                               |

| No<br>. | Drugbank<br>ID | Name          | $\Delta G_{\text{MMPBSA}}$<br>kcal/mol | $\Delta G_{\text{thermo}}$<br>kcal/mol | Experimental SARS-CoV-2 data                                                                                                                       |
|---------|----------------|---------------|----------------------------------------|----------------------------------------|----------------------------------------------------------------------------------------------------------------------------------------------------|
|         |                |               |                                        |                                        | 2.2 $\mu\text{M}$ . <sup>26</sup> SARS-CoV-2 inhibition in SARS-CoV-2 titres in A549-ACE2 cells, $\text{IC}_{50} = 790 \text{ nM}$ . <sup>27</sup> |
| 81      | DB12121        | Entospletinib | -20.54                                 | -19.41                                 | ...                                                                                                                                                |
| 82      | DB12414        | Usistapide    | -20.45                                 | -19.74                                 | ...                                                                                                                                                |
| 83      | DB14878        | Liafensine    | -20.23                                 | -24.56                                 | ...                                                                                                                                                |
| 84      | DB12154        | Itacitinib    | -19.74                                 | -22.45                                 | ...                                                                                                                                                |
| 85      | DB15444        | Elexacaftor   | -19.32                                 | -23.22                                 | ...                                                                                                                                                |
| 86      | DB15006        | Flufenoxuron  | -19.30                                 | -23.12                                 | ...                                                                                                                                                |
| 87      | DB12465        | Ketanserin    | -18.45                                 | -20.98                                 | ...                                                                                                                                                |

## References Listed in Supplementary Table S1

1. Touret F, Gilles M, Barral K, Nougairède A, Decroly E, de Lamballerie X, et al. In vitro screening of a FDA approved chemical library reveals potential inhibitors of SARS-CoV-2 replication. *bioRxiv*. 2020:2020.2004.2003.023846. doi:10.1101/2020.04.03.023846
2. Bellavite P, Donzelli A. Hesperidin and SARS-CoV-2: New light on the healthy function of citrus fruits. *Antioxidants*. 2020;9(8):742.
3. Xiao X, Wang C, Chang D, Wang Y, Dong X, Jiao T, et al. Identification of potent and safe antiviral therapeutic candidates against SARS-CoV-2. *bioRxiv*. 2020:2020.2007.2006.188953. doi:10.1101/2020.07.06.188953
4. Xie X, Muruato AE, Zhang X, Lokugamage KG, Fontes-Garfias CR, Zou J, et al. A nanoluciferase SARS-CoV-2 for rapid neutralization testing and screening of anti-infective drugs for COVID-19. *bioRxiv*. 2020:2020.06.22.165712. doi:10.1101/2020.06.22.165712.
5. Kuo CJ, Chao TL, Kao HC, Tsai YM, Liu YK, Wang LH, et al. Kinetic characterization and inhibitor screening for the proteases leading to identification of drugs against SARS-CoV-2. *Antimicrob Agents Chemother*. 2021. doi:10.1128/AAC.02577-20
6. Pickard A, Calverley BC, Chang J, Garva R, Lu Y, Kadler KE. Discovery of repurposed drugs that slow SARS-CoV-2 replication in human cells. *bioRxiv*. 2021.
7. Yamamoto N, Matsuyama S, Hoshino T, Yamamoto N. Nelfinavir inhibits replication of severe acute respiratory syndrome coronavirus 2 in vitro. *bioRxiv*. 2020:2020.2004.2006.026476. doi:10.1101/2020.04.06.026476
8. Vatansever EC, Yang KS, Drelich AK, Kratch KC, Cho C-C, Kempaiah KR, et al. Bepiridil is potent against SARS-CoV-2 in vitro. *Proceedings of the National Academy of Sciences*. 2021;118(10):e2012201118. doi:10.1073/pnas.2012201118
9. Rizzuti B, Grande F, Conforti F, Jimenez-Alesanco A, Ceballos-Laita L, Ortega-Alarcon D, et al. Rutin is a low micromolar inhibitor of SARS-CoV-2 main protease 3CLpro: Implications for drug design of quercetin analogs. *Biomedicines*. 2021;9(4):375. <https://www.mdpi.com/2227-9059/9/4/375>.
10. Weston S, Coleman CM, Haupt R, Logue J, Matthews K, Frieman MB. Broad anti-coronaviral activity of FDA approved drugs against SARS-CoV-2 *in vitro* and SARS-CoV *in vivo*. *bioRxiv*. 2020:2020.2003.2025.008482. doi:10.1101/2020.03.25.008482
11. Dyal J, Coleman CM, Hart BJ, Venkataraman T, Holbrook MR, Kindrachuk J, et al. Repurposing of clinically developed drugs for treatment of middle east respiratory syndrome coronavirus infection. *Antimicrobial Agents and Chemotherapy*. 2014;58(8):4885-4893. doi:10.1128/aac.03036-14
12. Raymonda MH, Ciesla JH, Monaghan M, Leach J, Asantewaa G, Smorodintsev-Schiller LA, et al. Pharmacologic profiling reveals lapatinib as a novel antiviral against SARS-CoV-2 in vitro. *bioRxiv*. 2020:2020.2011.2025.398859. doi:10.1101/2020.11.25.398859



13. Riva L, Yuan S, Yin X, Martin-Sancho L, Matsunaga N, Burgstaller S, et al. A large-scale drug repositioning survey for SARS-CoV-2 antivirals. *BioRxiv*. 2020.
14. Malik S, Gupta A, Zhong X, Rasmussen TP, Manautou JE, Bahal R. Emerging therapeutic modalities against COVID-19. *Pharmaceuticals (Basel)*. 2020;13(8):188. doi:10.3390/ph13080188
15. Ku KB, Shin HJ, Kim HS, Kim B-T, Kim S-J, Kim C. Repurposing screens of FDA-approved drugs identify 29 inhibitors of SARS-CoV-2. *J Microbiol Biotechnol*. 2020;30(12):1843-1853. doi:10.4014/jmb.2009.09009
16. Shin JS, Jung E, Jang Y, Han SB, Kim M. Identification of diphenoxylate as an antiviral agent against severe acute respiratory syndrome coronavirus 2. *ChemRxiv*. 2020(June):chemrxiv.12496547.v1 doi:doi:10.26434/chemrxiv.12496547.v1
17. Garcia Jr G, Sharma A, Ramaiah A, Sen C, Kohn DB, Gomperts BN, et al. Antiviral drug screen of kinase inhibitors identifies cellular signaling pathways critical for SARS-CoV-2 replication. *Cell Reports*. 2020:in press. doi:10.2139/ssrn.3682004
18. Jan J-T, Cheng T-JR, Juang Y-P, Ma H-H, Wu Y-T, Yang W-B, et al. Identification of existing pharmaceuticals and herbal medicines as inhibitors of SARS-CoV-2 infection. *Proceedings of the National Academy of Sciences*. 2021;118(5):e2021579118. doi:10.1073/pnas.2021579118
19. Killick R, Ballard C, Doherty P, Williams G. Using the SARS infection transcriptional signature to identify potential treatments for covid-19. *ChemRxiv*. 2020(May):chemrxiv.12327554.v1 doi:10.26434/chemrxiv.12327554.v1
20. Choi R, Zhou M, Shek R, Wilson JW, Tillery L, Craig JK, et al. High-throughput screening of the reframe, pandemic box, and COVID box drug repurposing libraries against SARS-cov2 nsp15 endoribonuclease to identify small-molecule inhibitors of viral activity. *bioRxiv*. 2021:2021.2001.2021.427657. doi:10.1101/2021.01.21.427657
21. Mulgaonkar N, Wang H, Mallawarachchi S, Fernando S, Martina B, Ruzek D. Bcr-abl tyrosine kinase inhibitor imatinib as a potential drug for COVID-19. *bioRxiv*. 2020:2020.2006.2018.158196. doi:10.1101/2020.06.18.158196
22. Touret F, Driouich J-S, Cochin M, Rémi Petit P, Gilles M, Barthélémy K, et al. Preclinical evaluation of imatinib does not support its use as an antiviral drug against SARS-CoV-2. *bioRxiv*. 2020:2020.2011.2017.386904. doi:10.1101/2020.11.17.386904
23. Han Y, Yang L, Duan X, Duan F, Nilsson-Payant BE, Yaron TM, et al. Identification of candidate COVID-19 therapeutics using hpsc-derived lung organoids. *bioRxiv*. 2020:2020.2005.2005.079095. doi:10.1101/2020.05.05.079095
24. Milani M, Donalisio M, Bonotto RM, Schneider E, Arduino I, Boni F, et al. Combined in silico and in vitro approaches identified the antipsychotic drug lurasidone and the antiviral drug elbasvir as SARS-cov2 and hcov-oc43 inhibitors. *Antiviral Research*. 2021;189:105055. doi:https://doi.org/10.1016/j.antiviral.2021.105055
25. Ellinger B, Bojkova D, Zaliani A, Cinatl J, Claussen C, Westhaus S, et al. Identification of inhibitors of SARS-CoV-2 in-vitro cellular toxicity in human (caco-2) cells using a large scale drug repurposing collection. *Research Square*. 2021:s-23951/v1. doi:10.21203/rs.3.rs-23951/v1. Accessed 2021/04/14.

26. Drayman N, Jones KA, Azizi S-A, Froggatt HM, Tan K, Maltseva NI, et al. Drug repurposing screen identifies masitinib as a 3CLpro inhibitor that blocks replication of SARS-CoV-2 *in vitro*. *bioRxiv*. 2020:2020.2008.2031.274639. doi:10.1101/2020.08.31.274639
27. Meyer B, Chiaravalli J, Gellenoncourt S, Brownridge P, Bryne DP, Daly LA, et al. Characterisation of protease activity during SARS-CoV-2 infection identifies novel viral cleavage sites and cellular targets for drug repurposing. *bioRxiv*. 2021:2020.2009.2016.297945. doi:10.1101/2020.09.16.297945

**Table S2.** Description of top 20 drugs predicted to bind and inhibit SARS-CoV-2 helicase.

| Drug                                              | Structure                                                                           | Description                                                                                                                                                  | Binding Energy (kcal/mol) |
|---------------------------------------------------|-------------------------------------------------------------------------------------|--------------------------------------------------------------------------------------------------------------------------------------------------------------|---------------------------|
| Dolutegravir (antiretroviral)                     | 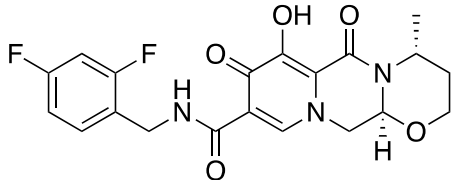   | An integrase inhibitor used to treat HIV/AIDS                                                                                                                | -42.2                     |
| Hesperidin (citrus flavanone glycoside)           |    | Hesperidin is a bioflavonoid antioxidant obtained from citrus plants                                                                                         | -41.2                     |
| Cabotegravir (antiviral integrase inhibitor)      |    | An HIV integrase inhibitor with a carbamoyl pyridone structure similar to that of dolutegravir                                                               | -40.8                     |
| Conivaptan (vasopressin inhibitor)                |   | Dual inhibitor of the vasopressin receptors, V1a and V2                                                                                                      | -40.2                     |
| Aprepitant (NK1 antagonist)                       |  | Selective antagonist of the neurokinin-1 receptor used to prevent chemotherapy-induced nausea and vomiting and to prevent postoperative nausea and vomiting. | -40.1                     |
| Bictegravir (antiviral integrase inhibitor)       |  | HIV integrase inhibitor structurally derived from dolutegravir                                                                                               | -39.8                     |
| Manidipine (Ca channel blocker, antihypertensive) |  | Dihydropyridine type calcium channel blocker used clinically as an antihypertensive                                                                          | -39.8                     |
| Tipranavir (antiviral protease inhibitor)         |  | Nonpeptidic protease inhibitor administered with ritonavir in combination therapy to treat HIV infection                                                     | -39.7                     |

|                                                                    |                                                                                     |                                                                                                                                                                                                                            |              |
|--------------------------------------------------------------------|-------------------------------------------------------------------------------------|----------------------------------------------------------------------------------------------------------------------------------------------------------------------------------------------------------------------------|--------------|
| <p>Aminoquinu<br/>ride<br/>(trypanocidal<br/>agent)</p>            | 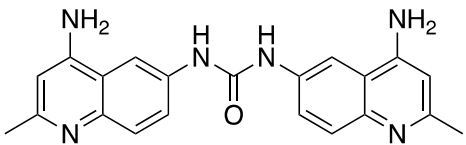   | <p>Belongs to the class of organic compounds known as 4-aminoquinolines that inhibit cellular glycosaminoglycan expression thereby inhibiting microbial attachment and host cell entry of trypanosomes</p>                 | <p>-39.6</p> |
| <p>Antrafenine<br/>(analgesic<br/>anti-<br/>inflammatory<br/>)</p> |    | <p>Phenylpiperazine derivative drug that acts as an analgesic and anti-inflammatory</p>                                                                                                                                    | <p>-39.1</p> |
| <p>RSV-604<br/>(antiviral)</p>                                     |   | <p>A benzodiazepine with submicromolar anti-RSV activity that act via interaction with the viral nucleocapsid protein</p>                                                                                                  | <p>-38.8</p> |
| <p>Epirubicin<br/>(anticancer<br/>intercalator)</p>                |  | <p>Anthracycline drug used for chemotherapy which acts by intercalating DNA resulting in complex formation which inhibits DNA and RNA synthesis and triggers DNA cleavage by topoisomerase II resulting in cell death.</p> | <p>-38.7</p> |
| <p>Pimozide<br/>(antipsychoti<br/>c)</p>                           |  | <p>Antipsychotic drug of the diphenylbutylpiperidine class that selectively inhibits type 2 dopaminergic receptors and also antagonizes alpha-adrenergic and 5-HT2 receptors</p>                                           | <p>-38.4</p> |

|                                           |                                                                                     |                                                                                                                                                                                                                        |       |
|-------------------------------------------|-------------------------------------------------------------------------------------|------------------------------------------------------------------------------------------------------------------------------------------------------------------------------------------------------------------------|-------|
| Rutin<br>(flavonol glycoside)             | 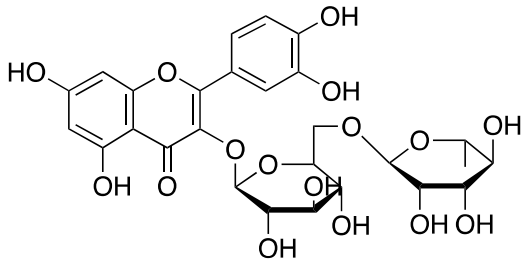   | Quercetin-3-O-rutinoside is a citrus flavonoid glycoside that combines the flavonol quercetin and the disaccharide rutinose. It has antioxidant properties and is used in natural medicines                            | -38.3 |
| Dicoumarol<br>(anticoagulant)             |    | Naturally occurring anticoagulant drug that depletes liver stores of vitamin K and inhibits reductases                                                                                                                 | -37.6 |
| Fluspirilene<br>(antipsychotic)           |   | Diphenylbutylpiperidine antipsychotic drug used for the treatment of schizophrenia that also targets glioma stem cells in glioblastoma through inactivating signal transducer and activator of transcription 3 (STAT3) | -36.8 |
| Doramapimod<br>(p38 MAP kinase inhibitor) |  | Pyrazoles that is used for treatment of rheumatoid arthritis, Crohn's disease and psoriasis due to its ability to inhibit p38 mitogen-activated protein kinase                                                         | -36.2 |
| Fexofenadine<br>(antihistamine)           |  | Antihistamine with selective peripheral H1-receptor antagonist activity used in the treatment of allergy symptoms, such as hay fever and urticaria                                                                     | -35.5 |
| Astemizole<br>(antihistamine)             |  | Antihistamine with H1-receptor antagonist activity that is also a hERG potassium channel blocker                                                                                                                       | -35.4 |

|                                       |                                                                                                                                                                                                                                                                                                                                                                                               |                                                                                              |              |
|---------------------------------------|-----------------------------------------------------------------------------------------------------------------------------------------------------------------------------------------------------------------------------------------------------------------------------------------------------------------------------------------------------------------------------------------------|----------------------------------------------------------------------------------------------|--------------|
| <p>Sertindole<br/>(antipsychotic)</p> | 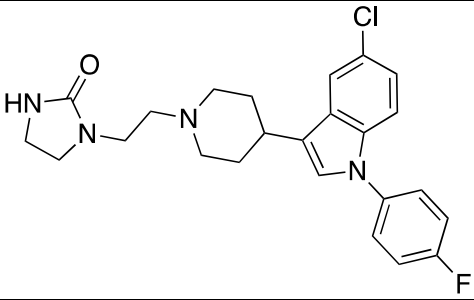 <p>The chemical structure of Sertindole consists of a 4-fluorophenyl group attached to the nitrogen of an indole ring. The 3-position of the indole ring is substituted with a 2-(2-oxo-2,3-dihydro-1H-imidaz-1-yl)ethylpiperidine group. The 5-position of the indole ring has a chlorine substituent.</p> | <p>Atypical antipsychotic with activity at dopamine and serotonin receptors in the brain</p> | <p>-34.6</p> |
|---------------------------------------|-----------------------------------------------------------------------------------------------------------------------------------------------------------------------------------------------------------------------------------------------------------------------------------------------------------------------------------------------------------------------------------------------|----------------------------------------------------------------------------------------------|--------------|

**Supplementary Table S3.** Ligplots showing how top 20 hits in alphabetical order interact with residues in SARS-CoV-2 helicase.

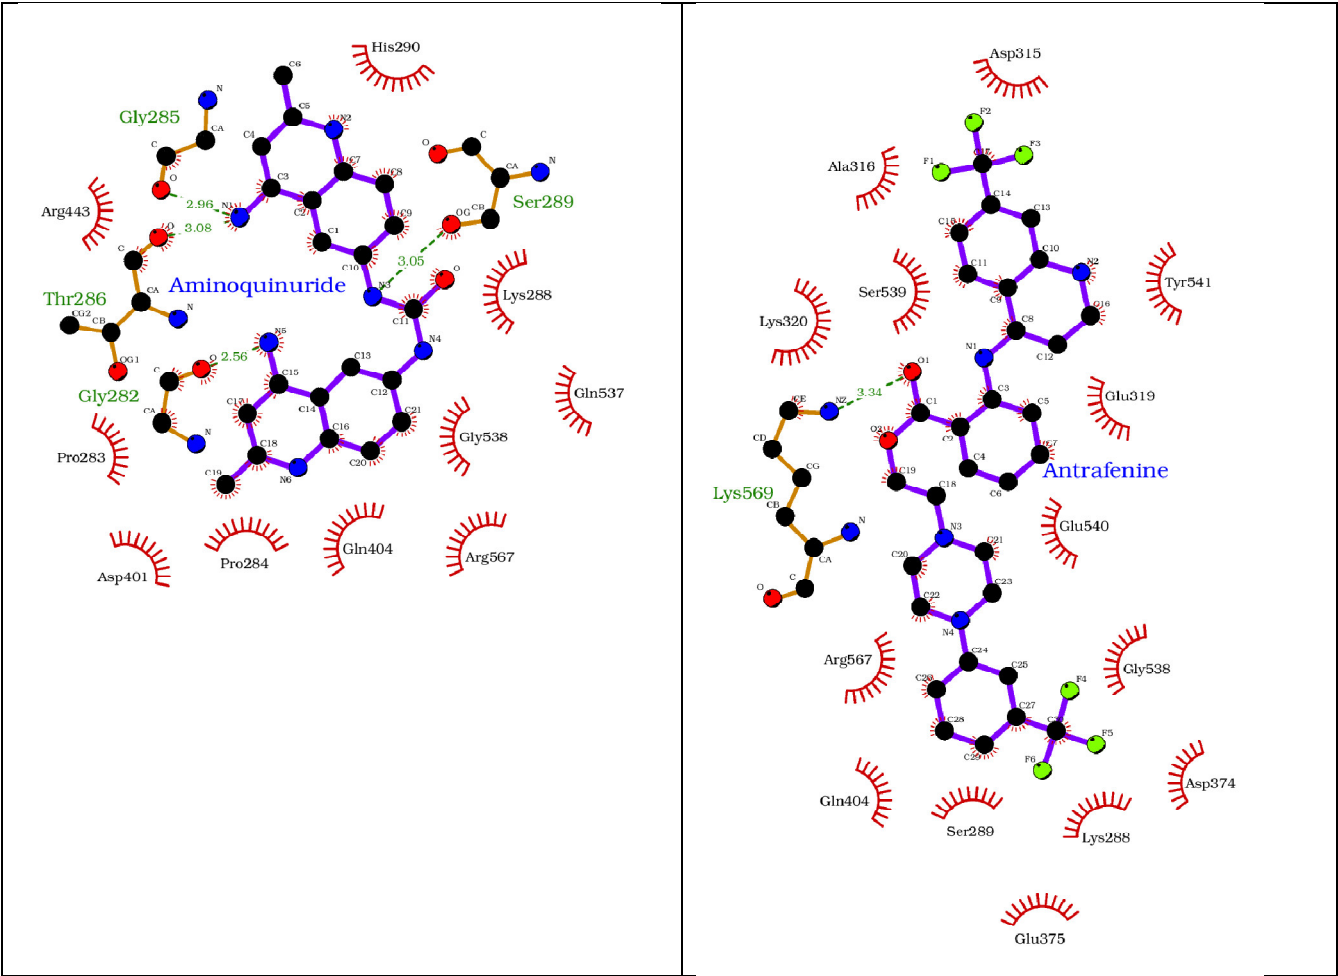

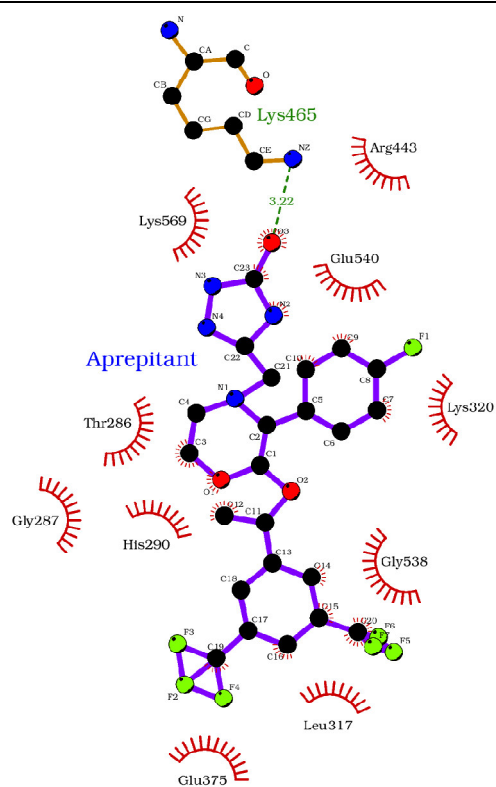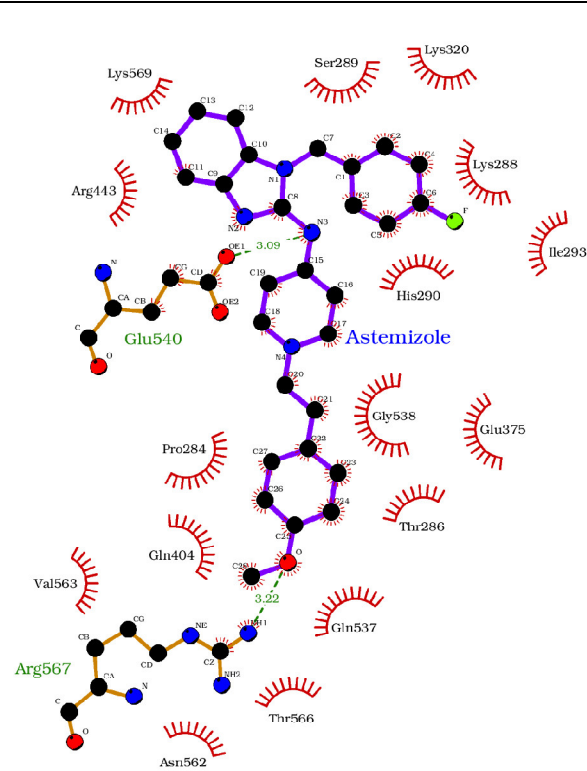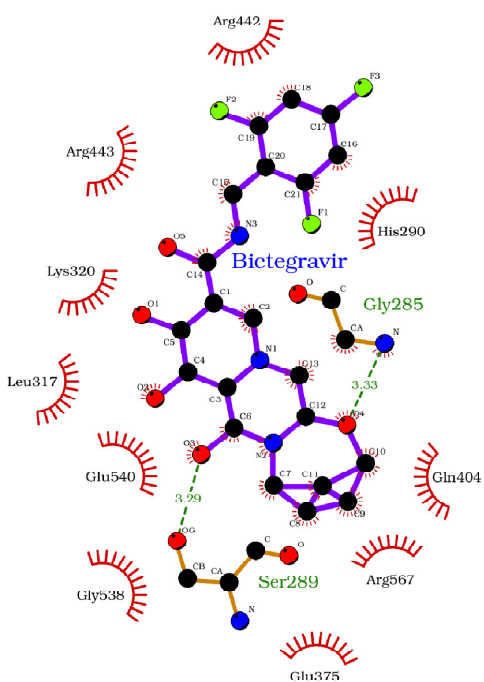



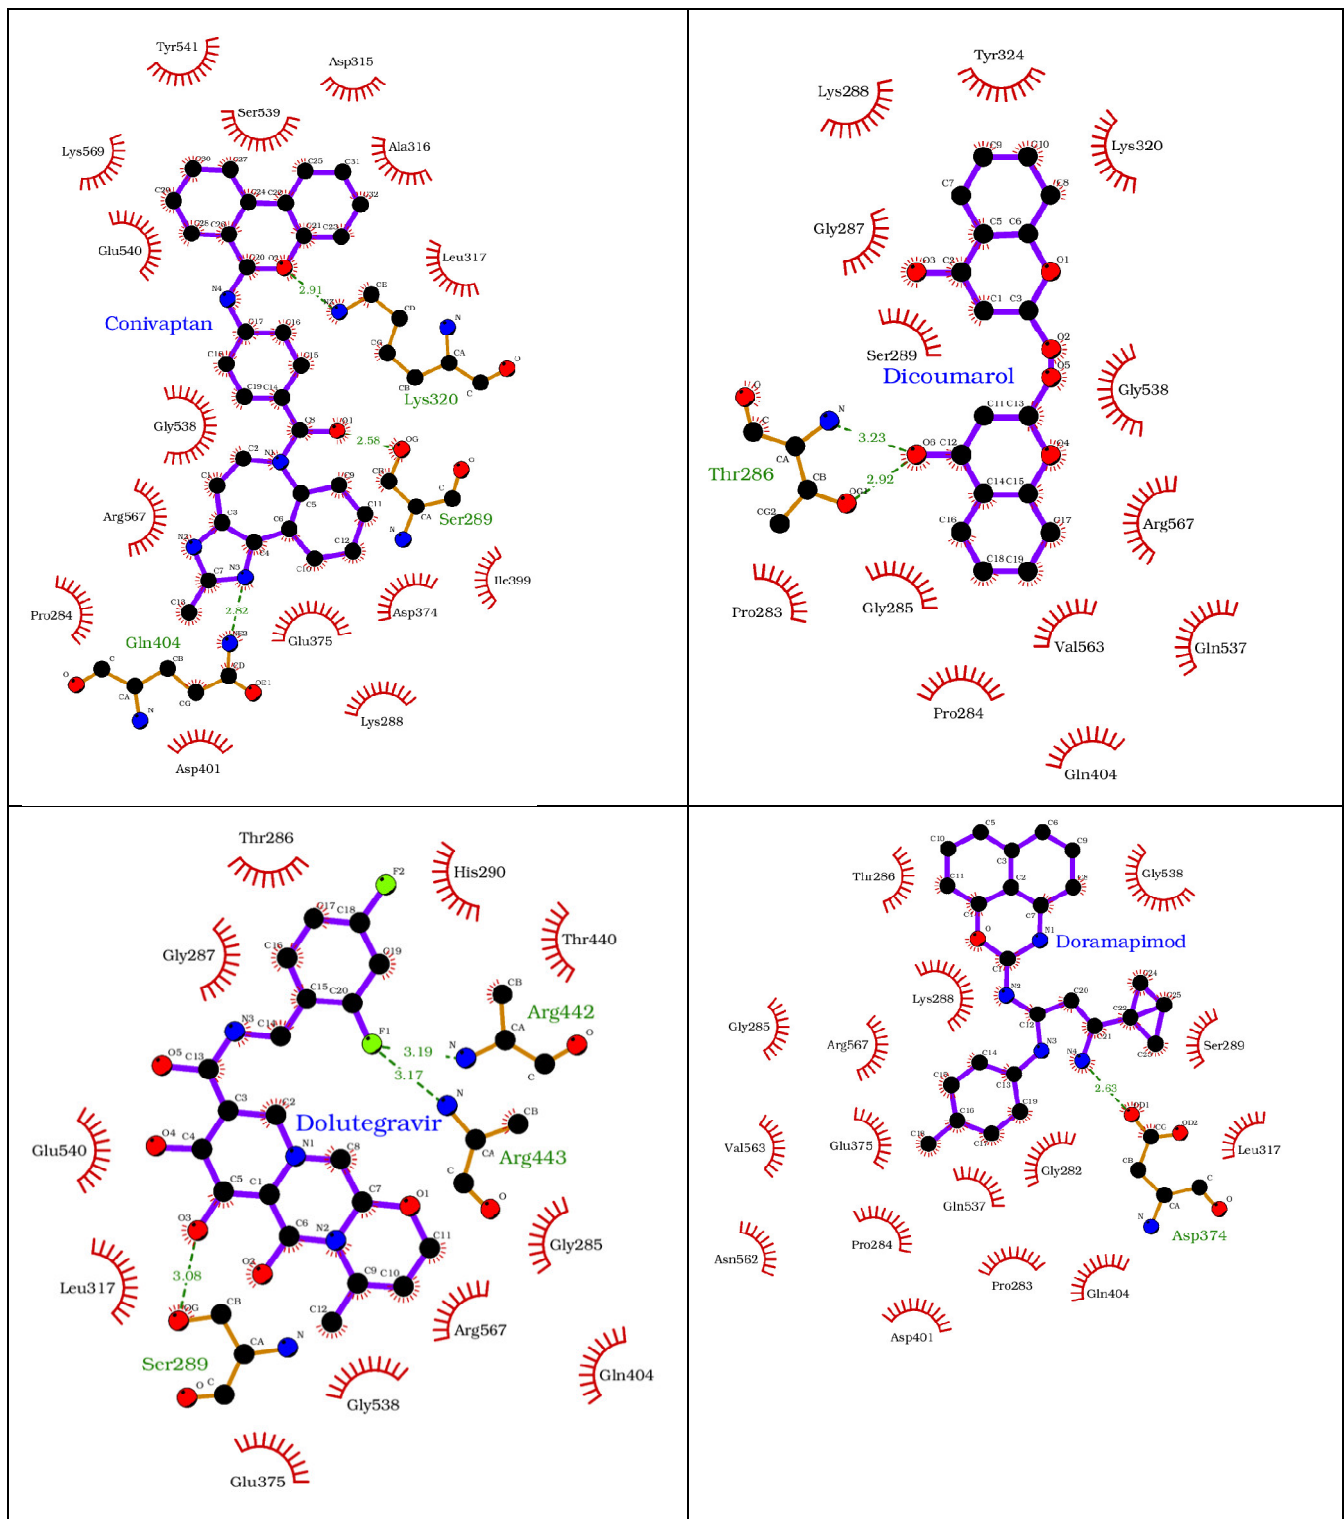

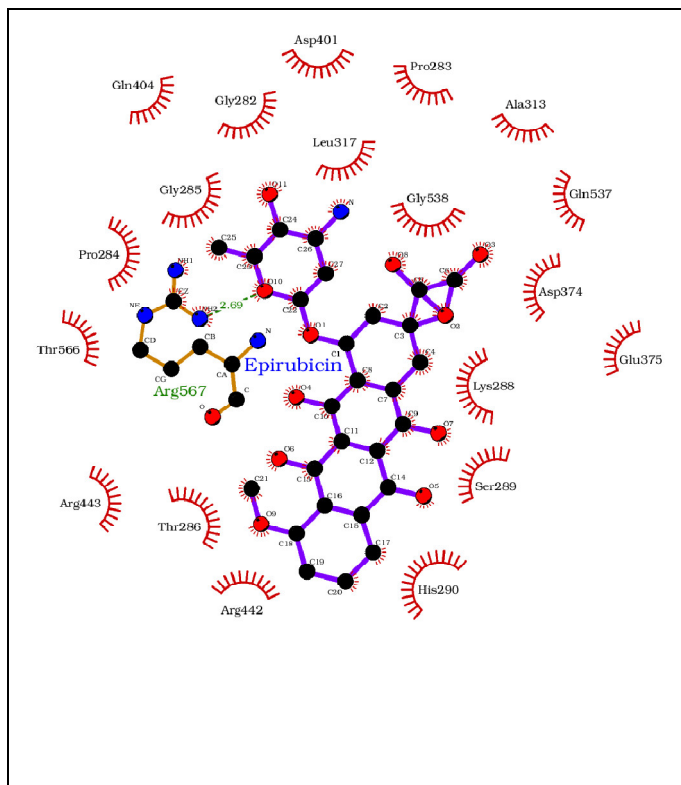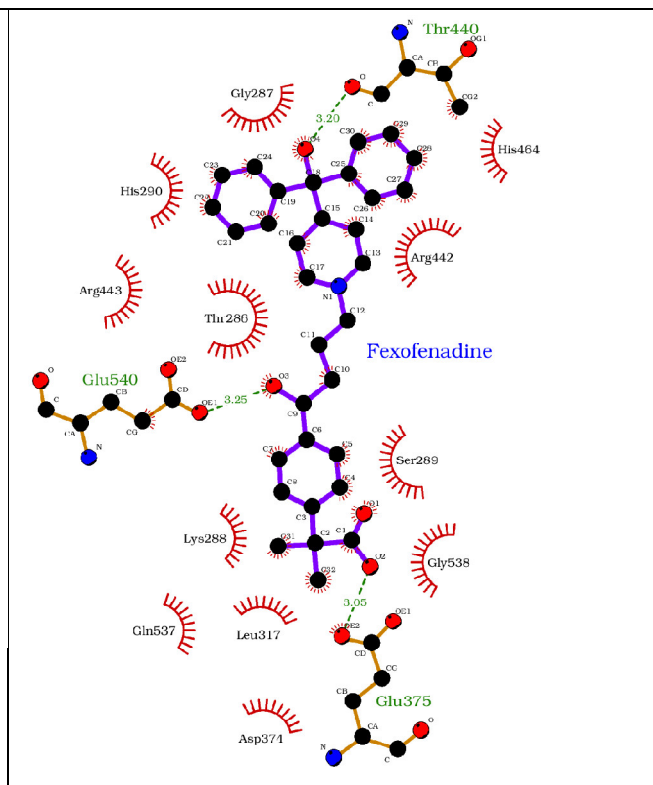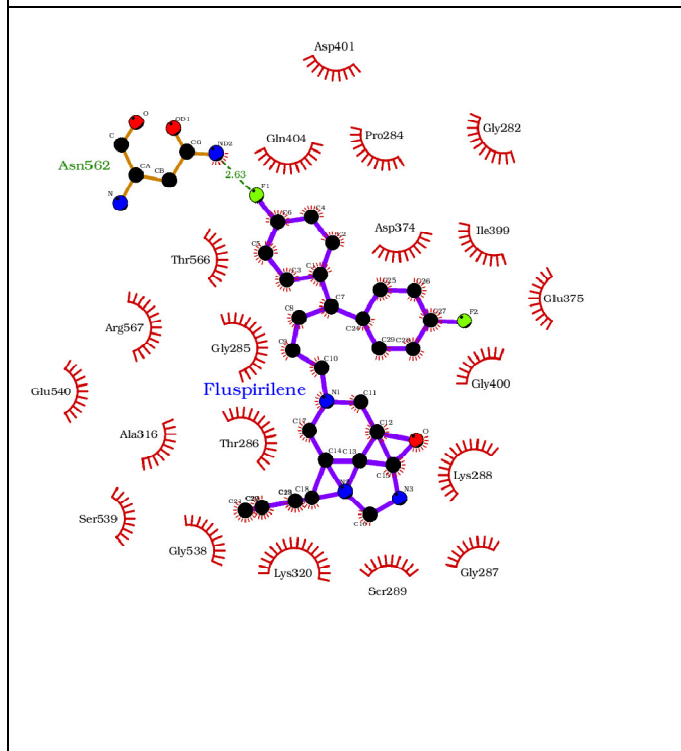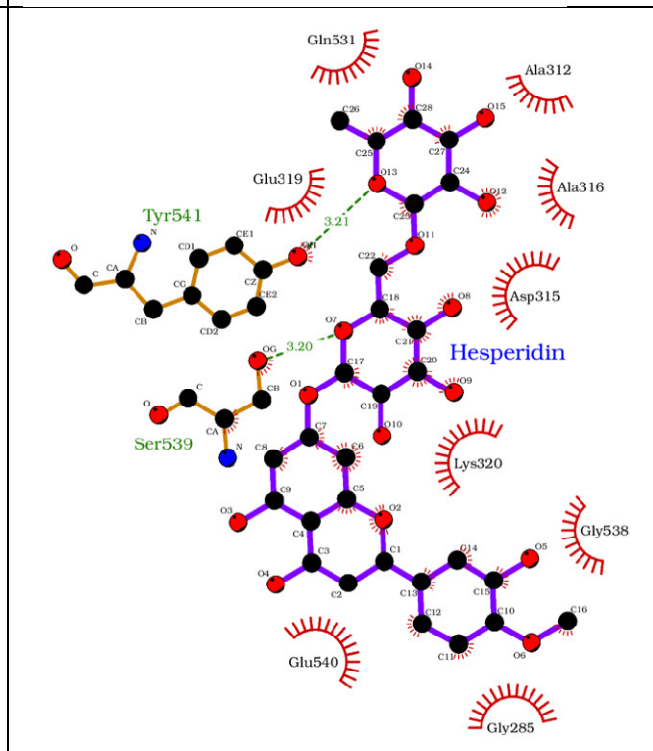

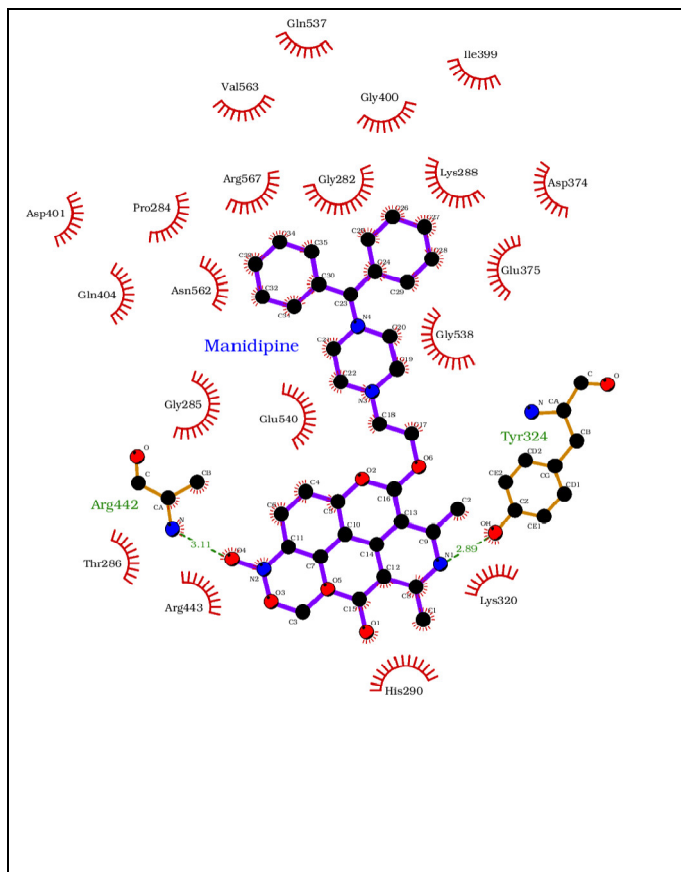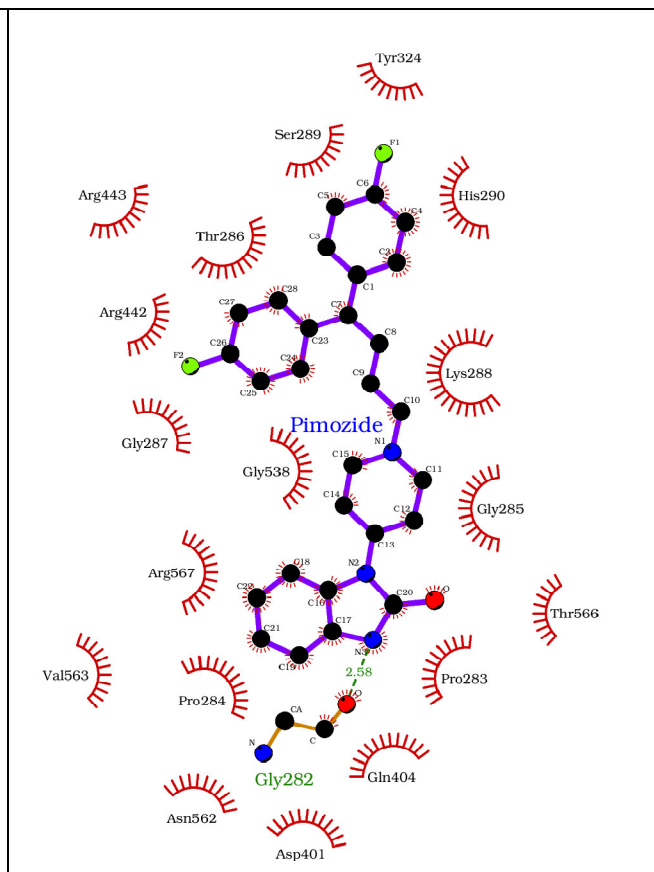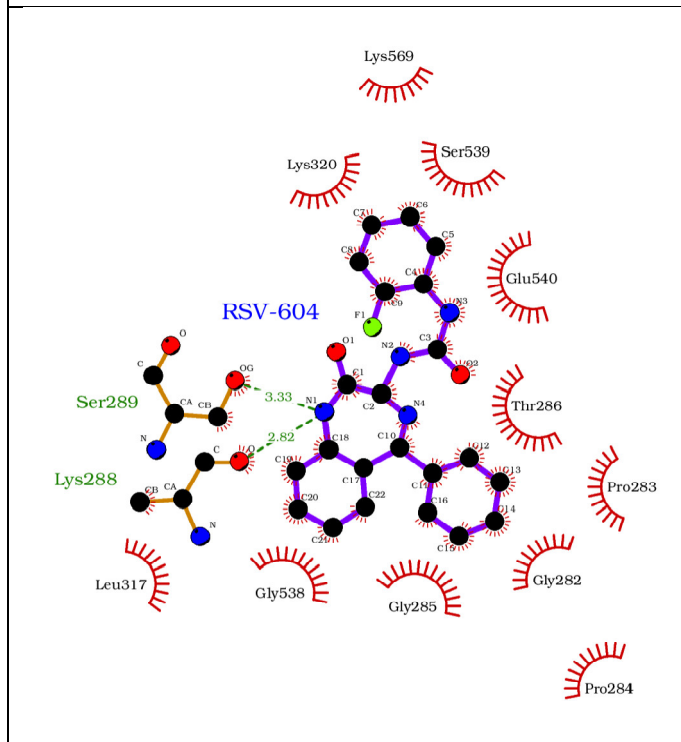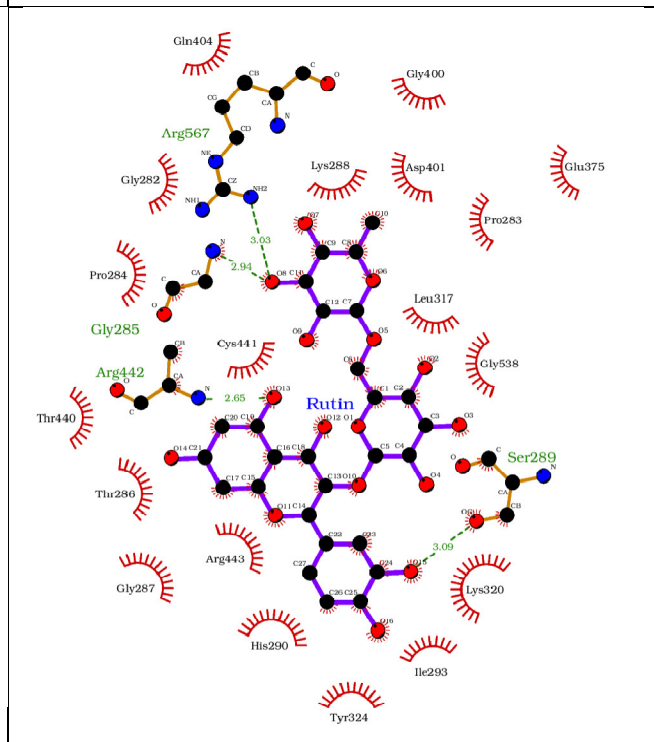

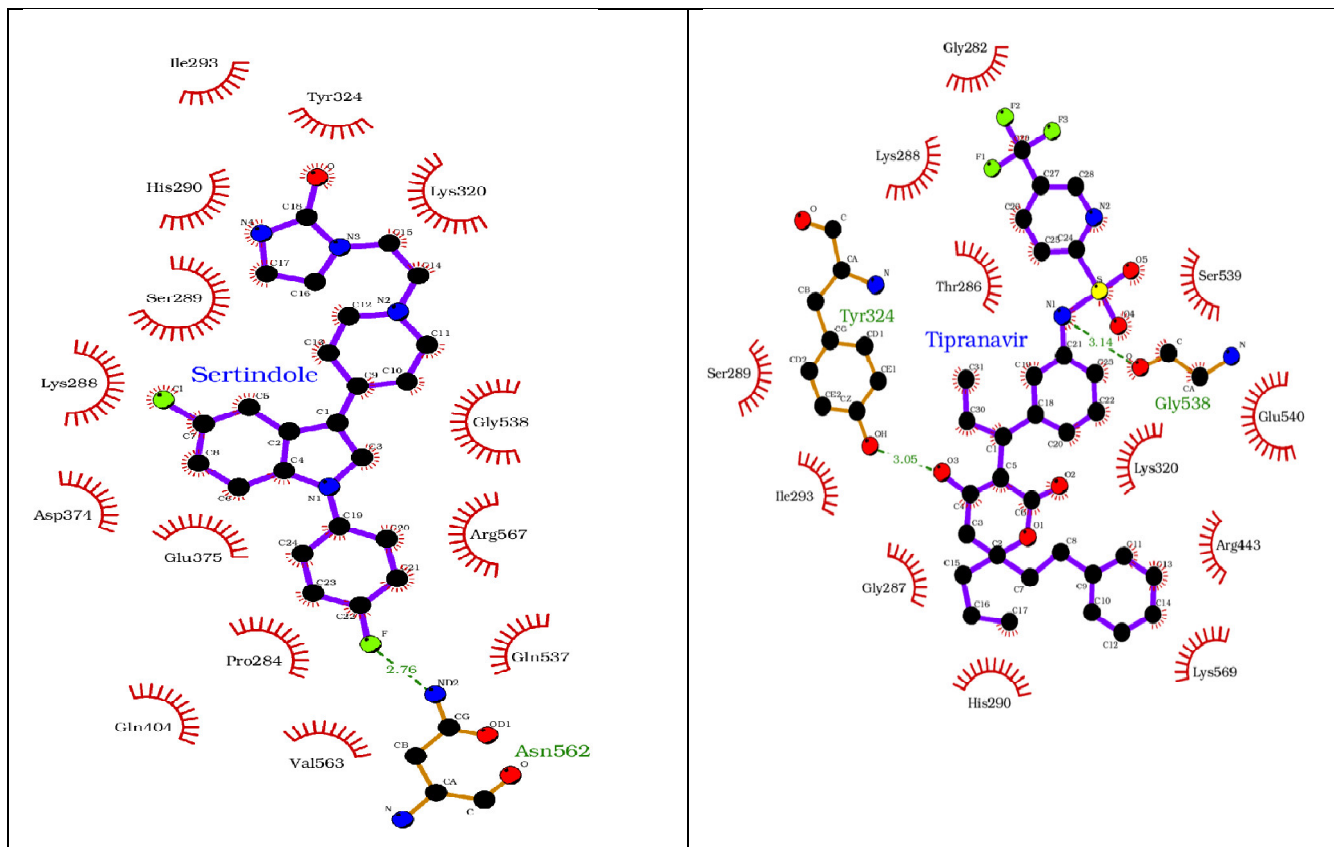

## Supplementary Table S4. Scripts Used in Modelling.

### 1)Conf.txt

```
receptor = 6Y2F.pdbqt
center_x= 9.245
center_y= -0.788
center_z = 18.371
size_x = 50
size_y = 50
size_z = 50
num_modes = 10
exhaustiveness = 50
```

### 2)vina\_screen.sh

```
#!/bin/bash
for f in ChEMBL*.pdbqt; do
    b=`basename $f .pdbqt`
    echo Processing ligand $b
    mkdir -p $b
    vina --config conf.txt --cpu 50 --ligand $f --out $b/out.pdbqt --log $b/log.txt
done
```

### 3)Script1.py

```
#!/usr/bin/env python
import sys
import glob
def doit(n):
    file_names = glob.glob('*/*.pdbqt')
    everything = []
    failures = []
    print 'Found', len(file_names), 'pdbqt files'
    for file_name in file_names:
        file = open(file_name)
        lines = file.readlines()
    file.close()
    try:
        line = lines[1]
        result = float(line.split(':')[1].split())[0])
    everything.append([result, file_name])
    except:
    failures.append(file_name)
    everything.sort(lambda x,y: cmp(x[0], y[0]))
    part = everything[:n]
    for p in part:
```

```
    print p[1],
print
if len(failures) > 0:
    print 'WARNING:', len(failures), 'pdbqt files could not be processed'
if __name__ == '__main__':
    doit(int(sys.argv[1]))
```
